# Supplementary material for: Progress toward Polymerization Reaction Monitoring with Different Dienes: How Small Amounts of Dienes Affect ansa-Zirconocenes/Borate/Triisobutylaluminium Catalyst Systems
Source: MDPI journal article supplement (doi:10.3390/polym14163239), 2022-08-09
Supplement: s1 [file s1]

## Supporting information

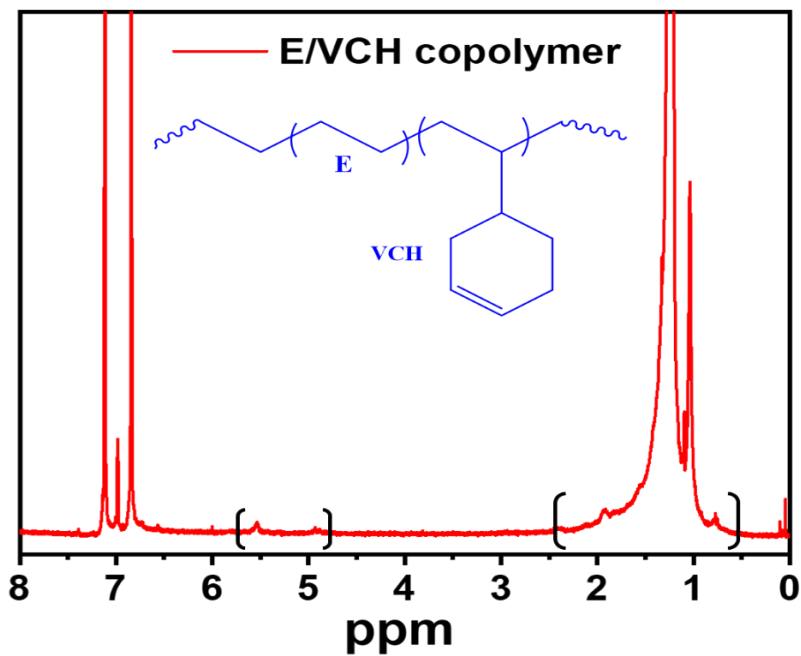

Figure S1a.

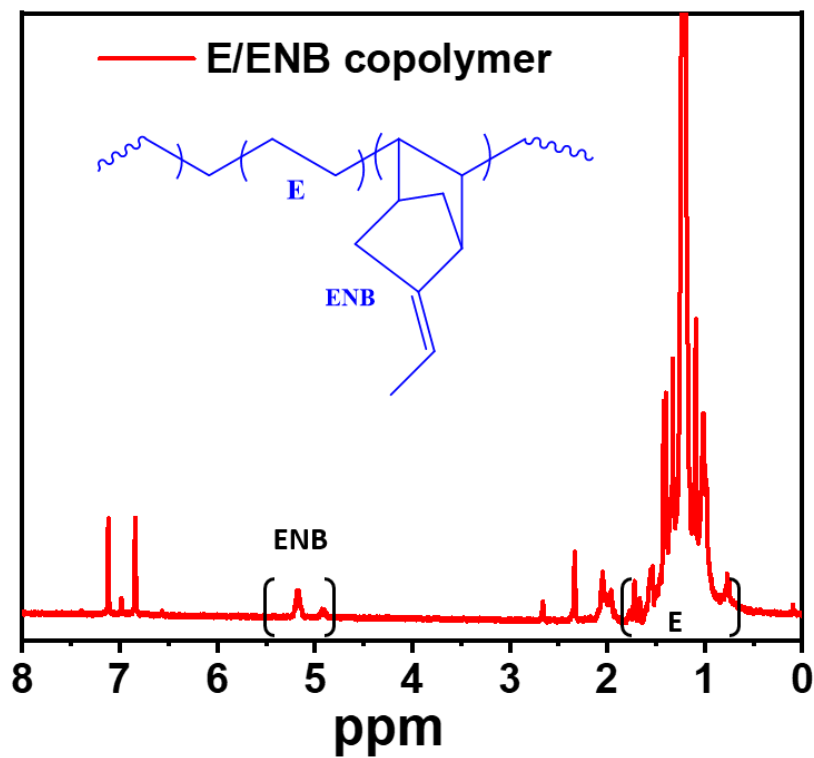

Figure S1b.

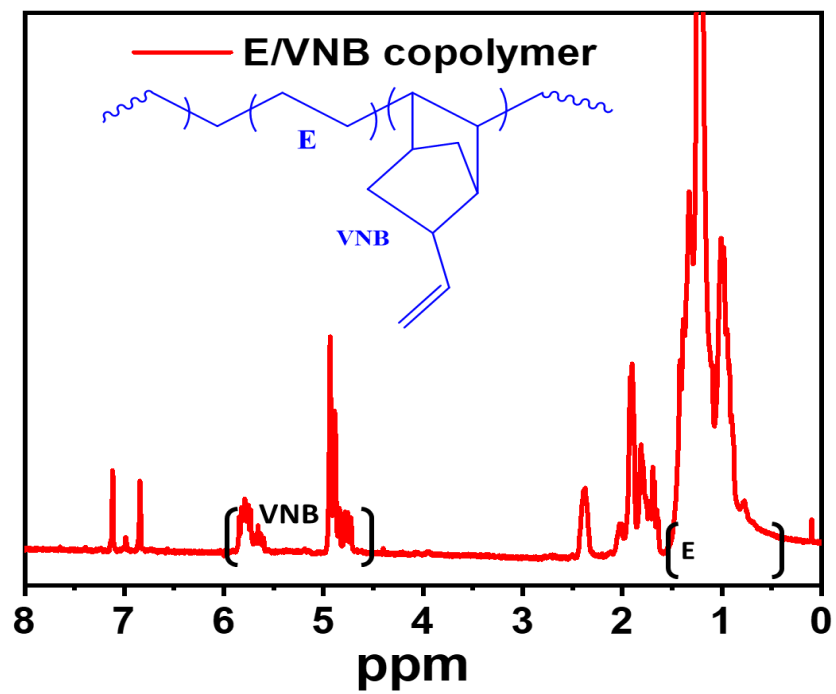

Figure S1c.

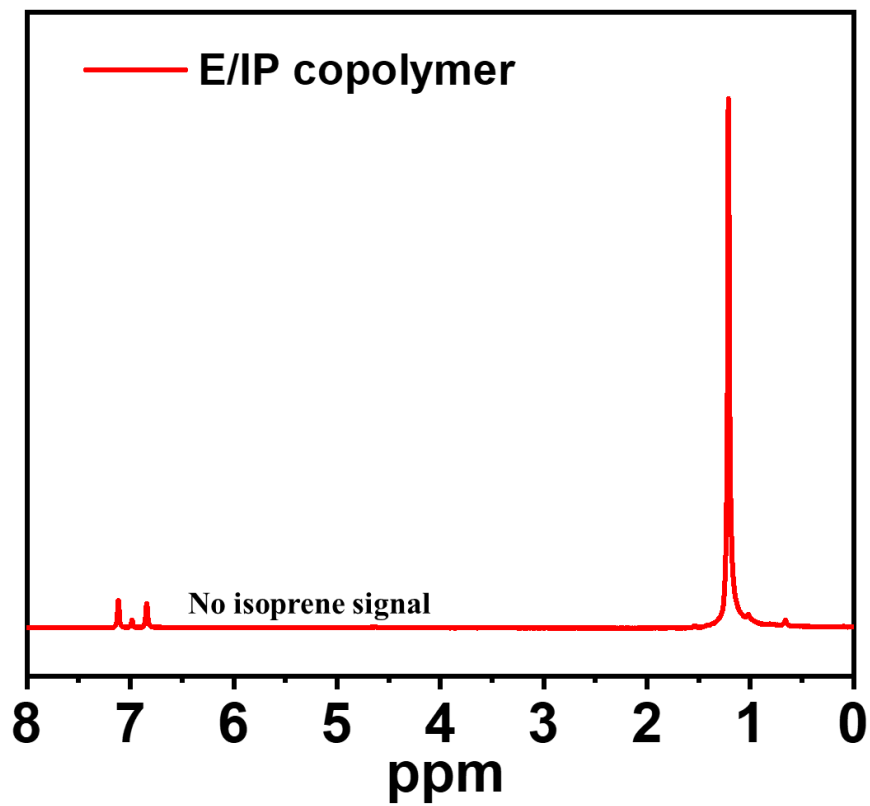

Figure S1d.

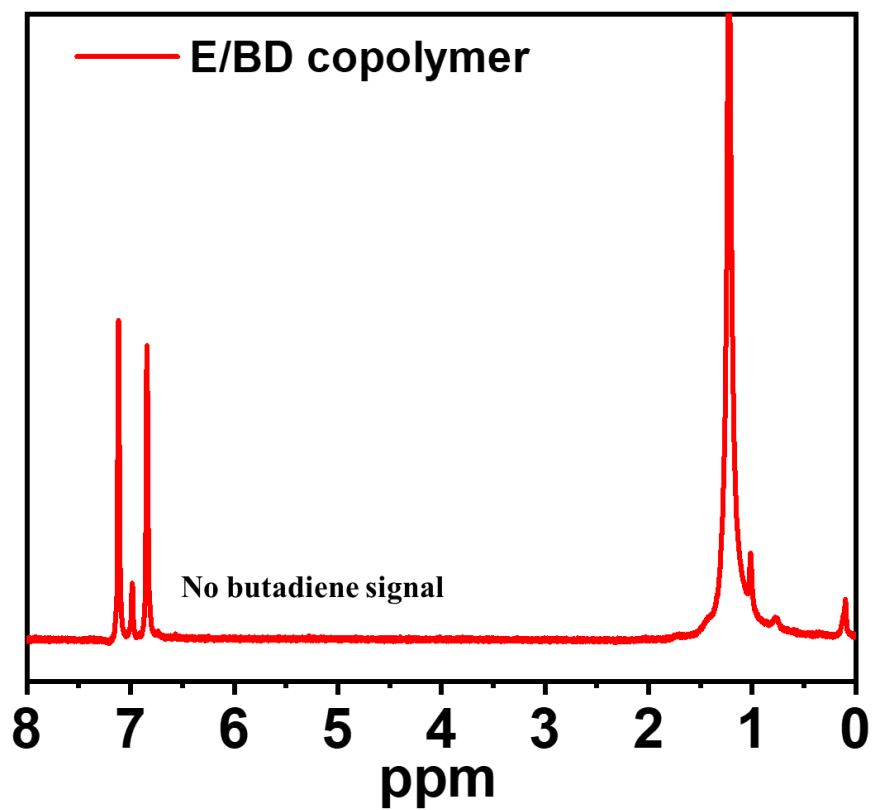

Figure S1e.

Figures S1a to S1e, the structure of E/diene copolymers

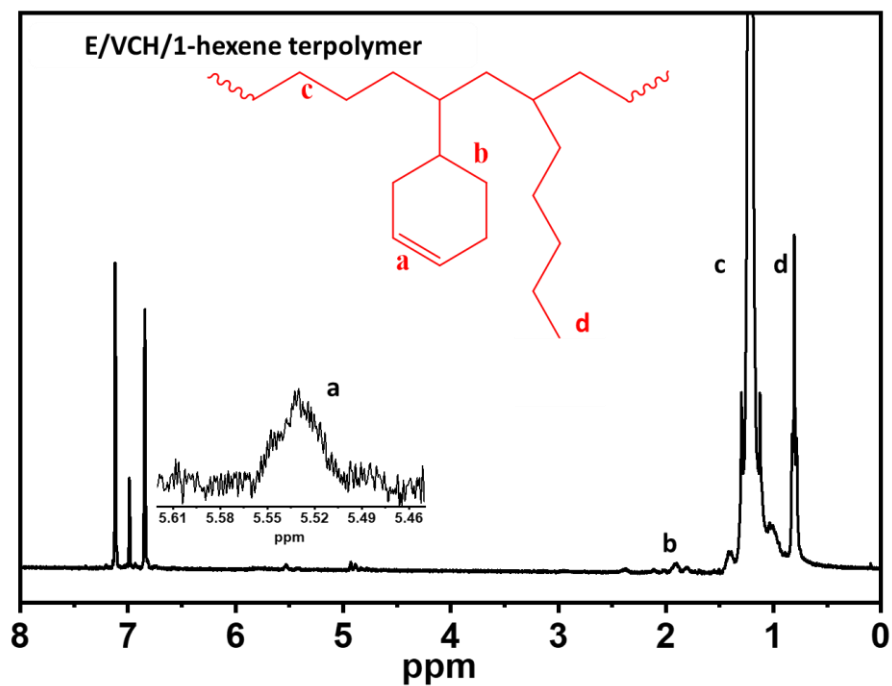

Figure S2a.

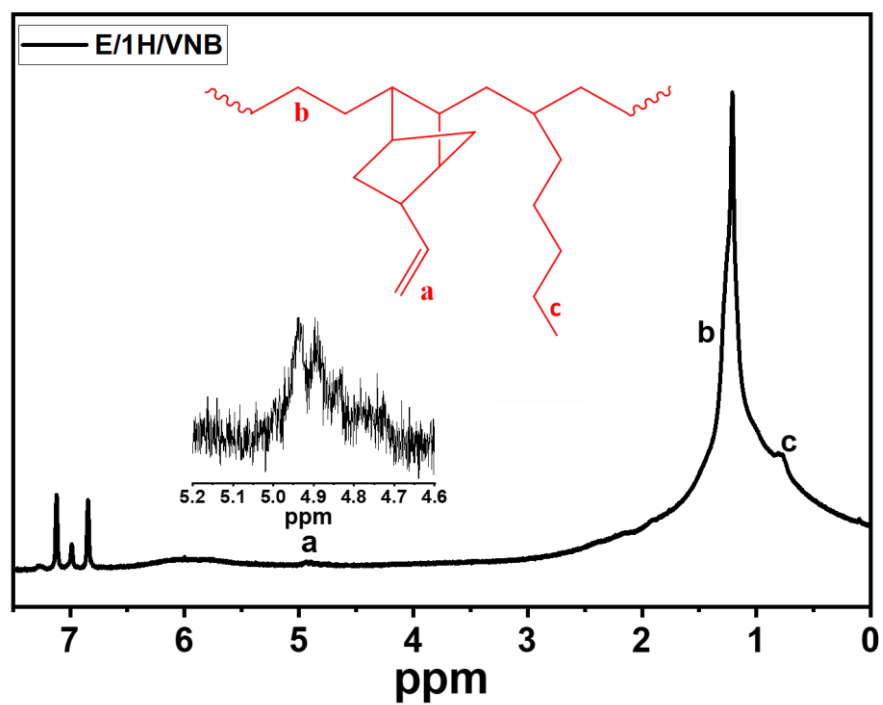

Figure S2b.

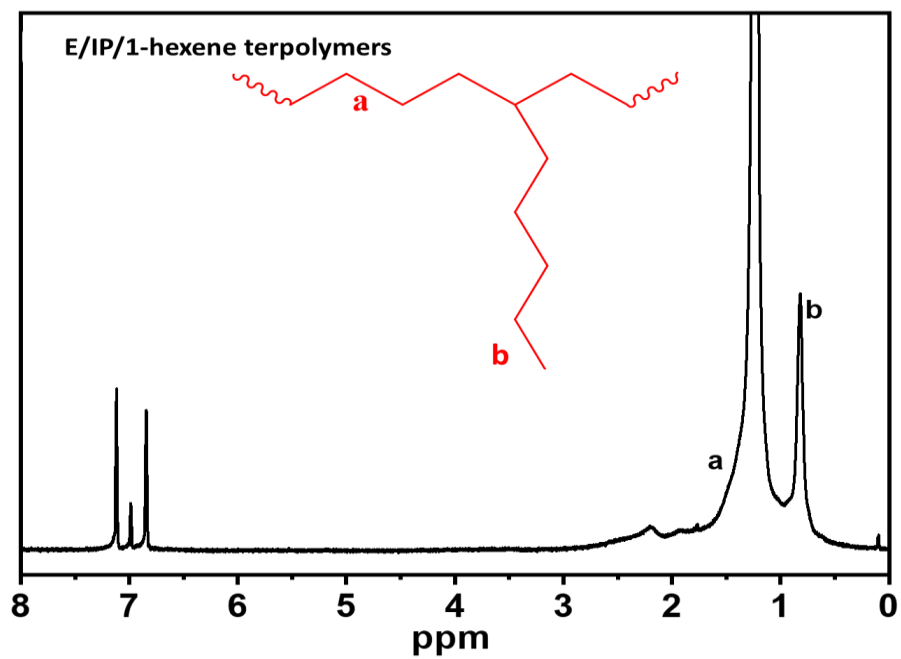

Figure S2c.

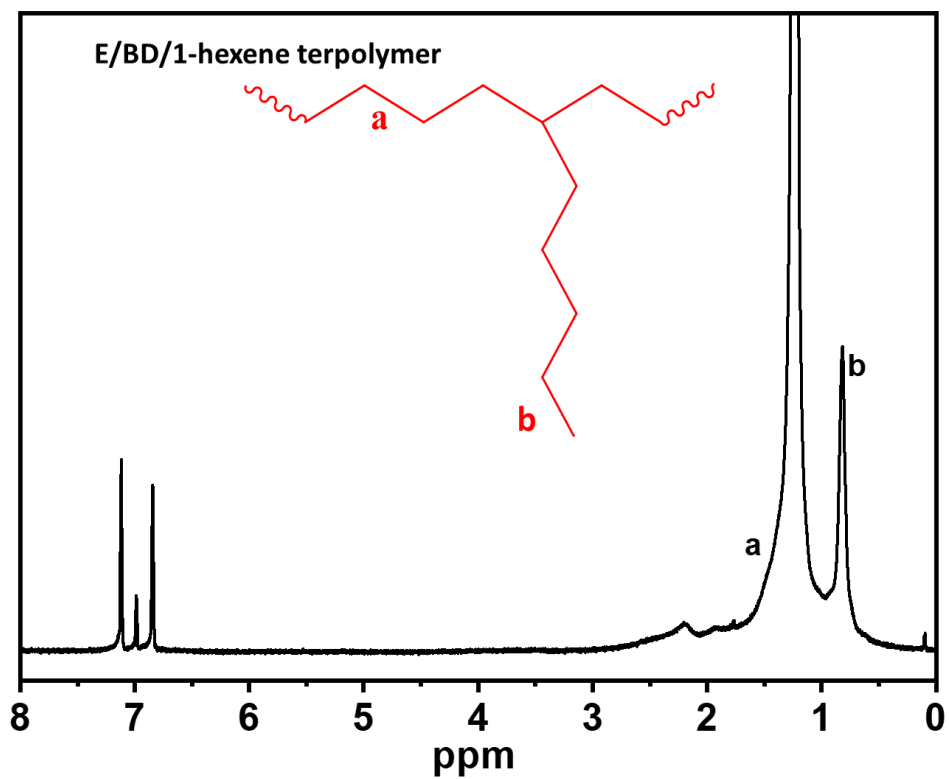

Figures S2d

Figures S2a to S2d, the structure of E/diene/1-hexene terpolymers

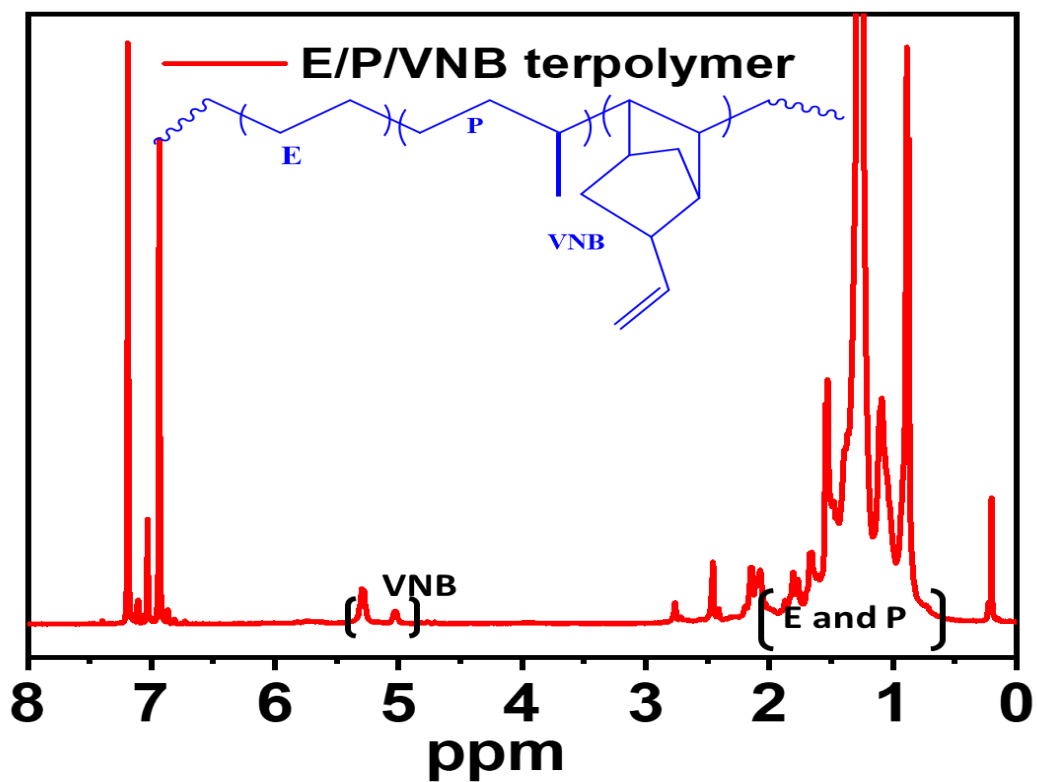

Figure S3a.

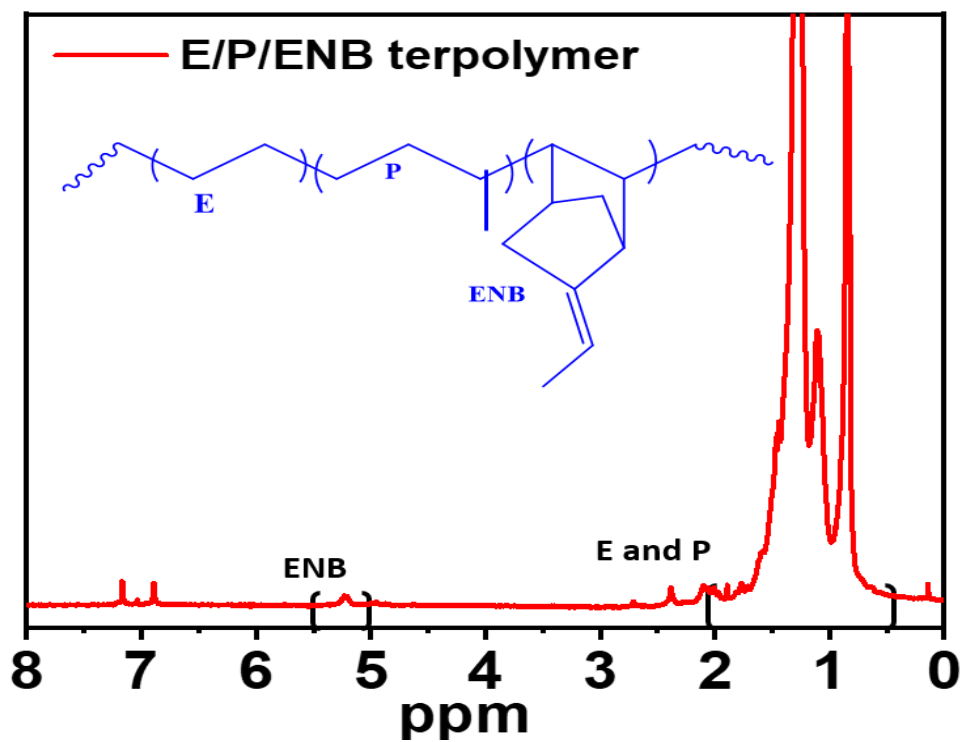

Figure S3b.

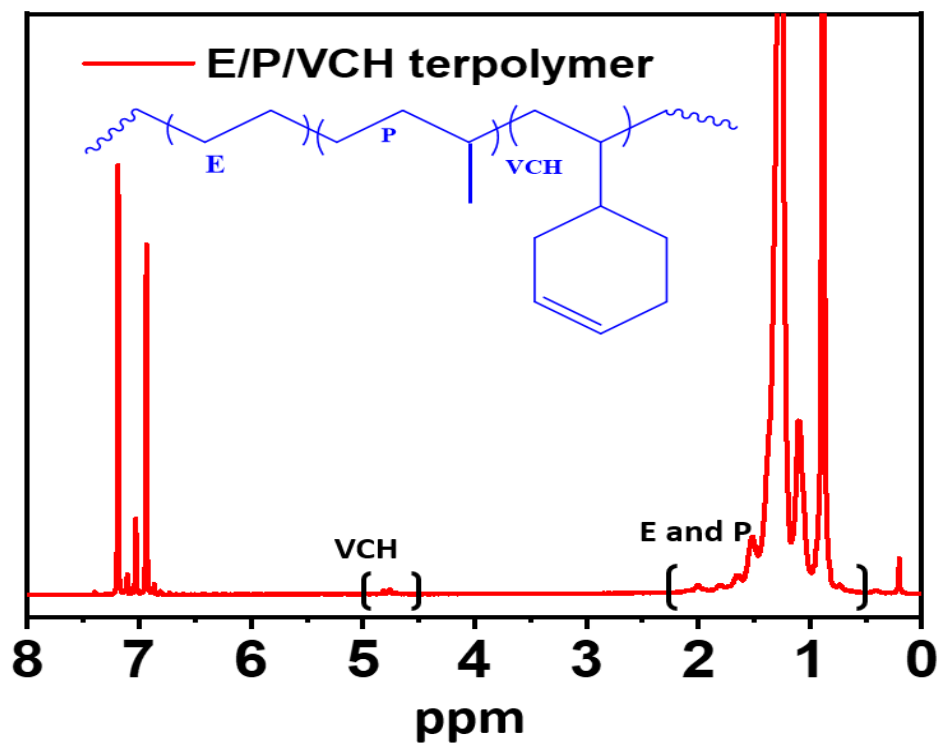

Figure S3c.

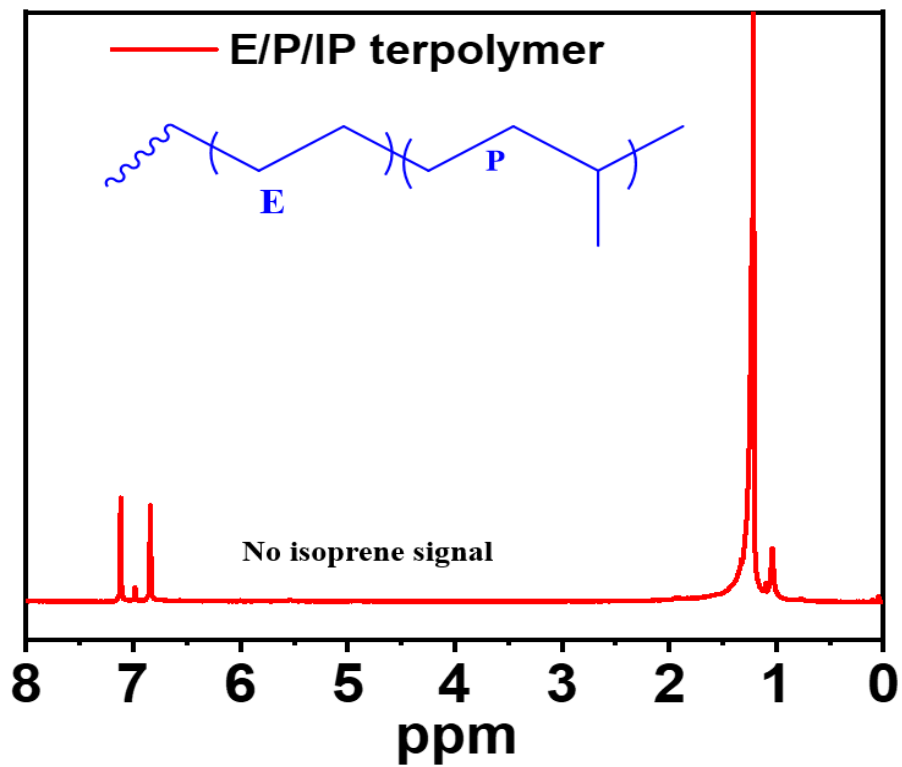

Figure S3d.

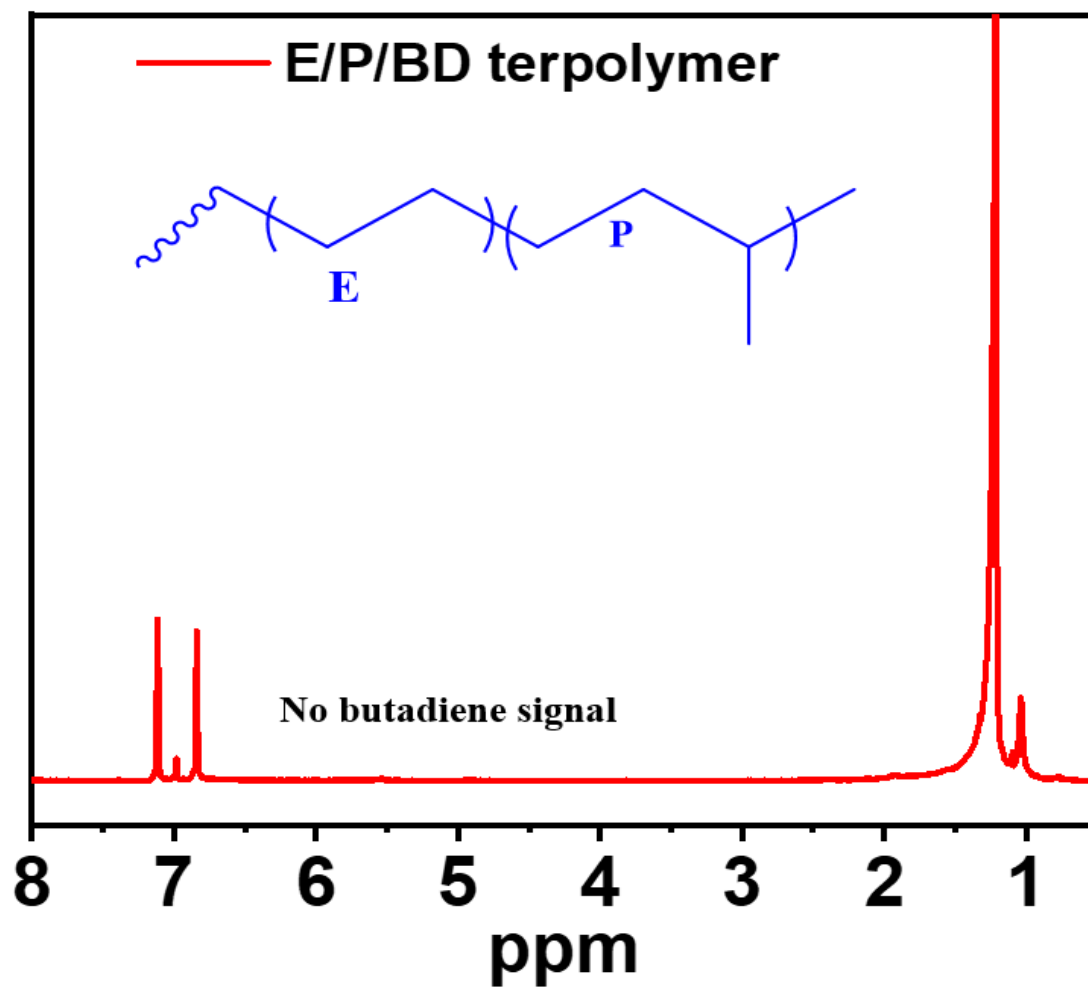

Figure S3e.

Figures S3a to S3e, the structure of E/diene/propylene terpolymers
